# Supplementary material for: Droplet digital PCR (ddPCR) for the detection and quantification of Ureaplasma spp.
Source: Springer Nature journal article supplement (doi:10.1186/s12879-021-06355-6), 2021-08-11
Supplement: MOESM1 [file 19562570]

**a. *Ureaplasma parvum* primes and probe**

|                                                                 |      |      |      |      |      |           |      |           |      |      |
|-----------------------------------------------------------------|------|------|------|------|------|-----------|------|-----------|------|------|
|                                                                 | 1650 | 1660 | 1670 | 1680 | 1690 | Up-F 1700 | 1710 | Up-P 1720 | 1730 | 1740 |
| <i>Ureaplasma parvum</i> serovar 1 str. ATCC 27813/1-2553       | 1649 | AA   | AA   | AA   | AA   | AA        | AA   | AA        | AA   | AA   |
| <i>Ureaplasma parvum</i> serovar 3 str. ATCC 27815/1-2553       | 1649 | AA   | AA   | AA   | AA   | AA        | AA   | AA        | AA   | AA   |
| <i>Ureaplasma parvum</i> serovar 6 str. ATCC 27818/1-2553       | 1649 | AA   | AA   | AA   | AA   | AA        | AA   | AA        | AA   | AA   |
| <i>Ureaplasma parvum</i> serovar 14 str. ATCC 33697/1-2553      | 1649 | AA   | AA   | AA   | AA   | AA        | AA   | AA        | AA   | AA   |
| <i>Ureaplasma urealyticum</i> serovar 2 str. ATCC 27814/1-2559  | 1650 | AA   | AA   | AA   | AA   | AA        | AA   | AA        | AA   | AA   |
| <i>Ureaplasma urealyticum</i> serovar 4 str. ATCC 27816/1-2559  | 1649 | AA   | AA   | AA   | AA   | AA        | AA   | AA        | AA   | AA   |
| <i>Ureaplasma urealyticum</i> serovar 5 str. ATCC 27817/1-2559  | 1649 | AA   | AA   | AA   | AA   | AA        | AA   | AA        | AA   | AA   |
| <i>Ureaplasma urealyticum</i> serovar 7 str. ATCC 27819/1-2559  | 1649 | AA   | AA   | AA   | AA   | AA        | AA   | AA        | AA   | AA   |
| <i>Ureaplasma urealyticum</i> serovar 8 str. ATCC 33175/1-2559  | 1649 | AA   | AA   | AA   | AA   | AA        | AA   | AA        | AA   | AA   |
| <i>Ureaplasma urealyticum</i> serovar 10 str. ATCC 33699/1-2553 | 1649 | AA   | AA   | AA   | AA   | AA        | AA   | AA        | AA   | AA   |
| <i>Ureaplasma urealyticum</i> serovar 11 str. ATCC 33698/1-2559 | 1649 | AA   | AA   | AA   | AA   | AA        | AA   | AA        | AA   | AA   |
| <i>Ureaplasma urealyticum</i> serovar 12 str. ATCC 33696/1-2559 | 1649 | AA   | AA   | AA   | AA   | AA        | AA   | AA        | AA   | AA   |
| <i>Ureaplasma urealyticum</i> serovar 13 str. ATCC 33698/1-2559 | 1649 | AA   | AA   | AA   | AA   | AA        | AA   | AA        | AA   | AA   |
| <i>Ureaplasma parvum</i> serovar 1 str. ATCC 27813/1-2553       | 1746 | CA   | AA   | TA   | TG   | TG        | AA   | TA        | TG   | AA   |
| <i>Ureaplasma parvum</i> serovar 3 str. ATCC 27815/1-2553       | 1746 | CA   | AA   | TA   | TG   | AA        | TA   | TG        | AA   | TA   |
| <i>Ureaplasma parvum</i> serovar 6 str. ATCC 27818/1-2553       | 1746 | CA   | AA   | TA   | TG   | AA        | TA   | TG        | AA   | TA   |
| <i>Ureaplasma parvum</i> serovar 14 str. ATCC 33697/1-2553      | 1746 | CA   | AA   | TA   | TG   | AA        | TA   | TG        | AA   | TA   |
| <i>Ureaplasma urealyticum</i> serovar 2 str. ATCC 27814/1-2559  | 1747 | TA   | AA   | TA   | TG   | AA        | TA   | TG        | AA   | TA   |
| <i>Ureaplasma urealyticum</i> serovar 4 str. ATCC 27816/1-2559  | 1746 | CA   | AA   | TA   | TG   | AA        | TA   | TG        | AA   | TA   |
| <i>Ureaplasma urealyticum</i> serovar 5 str. ATCC 27817/1-2559  | 1746 | CA   | AA   | TA   | TG   | AA        | TA   | TG        | AA   | TA   |
| <i>Ureaplasma urealyticum</i> serovar 7 str. ATCC 27819/1-2559  | 1746 | CA   | AA   | TA   | TG   | AA        | TA   | TG        | AA   | TA   |
| <i>Ureaplasma urealyticum</i> serovar 8 str. ATCC 33175/1-2559  | 1746 | CA   | AA   | TA   | TG   | AA        | TA   | TG        | AA   | TA   |
| <i>Ureaplasma urealyticum</i> serovar 10 str. ATCC 33699/1-2553 | 1746 | CA   | AA   | TA   | TG   | AA        | TA   | TG        | AA   | TA   |
| <i>Ureaplasma urealyticum</i> serovar 11 str. ATCC 33698/1-2559 | 1746 | CA   | AA   | TA   | TG   | AA        | TA   | TG        | AA   | TA   |
| <i>Ureaplasma urealyticum</i> serovar 12 str. ATCC 33696/1-2559 | 1746 | CA   | AA   | TA   | TG   | AA        | TA   | TG        | AA   | TA   |
| <i>Ureaplasma urealyticum</i> serovar 13 str. ATCC 33698/1-2559 | 1746 | CA   | AA   | TA   | TG   | AA        | TA   | TG        | AA   | TA   |

**b. *Ureaplasma urealyticum* primes and probe**

|                                                                 |      |      |      |      |      |      |      |      |      |      |
|-----------------------------------------------------------------|------|------|------|------|------|------|------|------|------|------|
|                                                                 | 2140 | 2150 | 2160 | 2170 | 2180 | 2190 | 2200 | 2210 | 2220 | 2230 |
| <i>Ureaplasma parvum</i> serovar 1 str. ATCC 27813/1-2553       | 2134 | G    | T    | T    | T    | T    | T    | T    | T    | T    |
| <i>Ureaplasma parvum</i> serovar 3 str. ATCC 27815/1-2553       | 2134 | G    | T    | T    | T    | T    | T    | T    | T    | T    |
| <i>Ureaplasma parvum</i> serovar 6 str. ATCC 27818/1-2553       | 2134 | G    | T    | T    | T    | T    | T    | T    | T    | T    |
| <i>Ureaplasma parvum</i> serovar 14 str. ATCC 33697/1-2553      | 2134 | G    | T    | T    | T    | T    | T    | T    | T    | T    |
| <i>Ureaplasma urealyticum</i> serovar 2 str. ATCC 27814/1-2559  | 2135 | A    | T    | T    | T    | T    | T    | T    | T    | T    |
| <i>Ureaplasma urealyticum</i> serovar 4 str. ATCC 27816/1-2559  | 2134 | A    | T    | T    | T    | T    | T    | T    | T    | T    |
| <i>Ureaplasma urealyticum</i> serovar 5 str. ATCC 27817/1-2559  | 2134 | A    | T    | T    | T    | T    | T    | T    | T    | T    |
| <i>Ureaplasma urealyticum</i> serovar 7 str. ATCC 27819/1-2559  | 2134 | A    | T    | T    | T    | T    | T    | T    | T    | T    |
| <i>Ureaplasma urealyticum</i> serovar 8 str. ATCC 33175/1-2559  | 2134 | A    | T    | T    | T    | T    | T    | T    | T    | T    |
| <i>Ureaplasma urealyticum</i> serovar 10 str. ATCC 33699/1-2553 | 2134 | A    | T    | T    | T    | T    | T    | T    | T    | T    |
| <i>Ureaplasma urealyticum</i> serovar 11 str. ATCC 33698/1-2559 | 2134 | A    | T    | T    | T    | T    | T    | T    | T    | T    |
| <i>Ureaplasma urealyticum</i> serovar 12 str. ATCC 33696/1-2559 | 2134 | A    | T    | T    | T    | T    | T    | T    | T    | T    |
| <i>Ureaplasma urealyticum</i> serovar 13 str. ATCC 33698/1-2559 | 2134 | A    | T    | T    | T    | T    | T    | T    | T    | T    |
| <i>Ureaplasma parvum</i> serovar 1 str. ATCC 27813/1-2553       | 2231 | CA   | AA   | AA   | AA   | AA   | AA   | AA   | AA   | AA   |
| <i>Ureaplasma parvum</i> serovar 3 str. ATCC 27815/1-2553       | 2231 | CA   | AA   | AA   | AA   | AA   | AA   | AA   | AA   | AA   |
| <i>Ureaplasma parvum</i> serovar 6 str. ATCC 27818/1-2553       | 2231 | CA   | AA   | AA   | AA   | AA   | AA   | AA   | AA   | AA   |
| <i>Ureaplasma parvum</i> serovar 14 str. ATCC 33697/1-2553      | 2231 | CA   | AA   | AA   | AA   | AA   | AA   | AA   | AA   | AA   |
| <i>Ureaplasma urealyticum</i> serovar 2 str. ATCC 27814/1-2559  | 2232 | CA   | AA   | AA   | AA   | AA   | AA   | AA   | AA   | AA   |
| <i>Ureaplasma urealyticum</i> serovar 4 str. ATCC 27816/1-2559  | 2231 | CA   | AA   | AA   | AA   | AA   | AA   | AA   | AA   | AA   |
| <i>Ureaplasma urealyticum</i> serovar 5 str. ATCC 27817/1-2559  | 2231 | CA   | AA   | AA   | AA   | AA   | AA   | AA   | AA   | AA   |
| <i>Ureaplasma urealyticum</i> serovar 7 str. ATCC 27819/1-2559  | 2231 | CA   | AA   | AA   | AA   | AA   | AA   | AA   | AA   | AA   |
| <i>Ureaplasma urealyticum</i> serovar 8 str. ATCC 33175/1-2559  | 2231 | CA   | AA   | AA   | AA   | AA   | AA   | AA   | AA   | AA   |
| <i>Ureaplasma urealyticum</i> serovar 10 str. ATCC 33699/1-2553 | 2231 | CA   | AA   | AA   | AA   | AA   | AA   | AA   | AA   | AA   |
| <i>Ureaplasma urealyticum</i> serovar 11 str. ATCC 33698/1-2559 | 2231 | CA   | AA   | AA   | AA   | AA   | AA   | AA   | AA   | AA   |
| <i>Ureaplasma urealyticum</i> serovar 12 str. ATCC 33696/1-2559 | 2231 | CA   | AA   | AA   | AA   | AA   | AA   | AA   | AA   | AA   |
| <i>Ureaplasma urealyticum</i> serovar 13 str. ATCC 33698/1-2559 | 2231 | CA   | AA   | AA   | AA   | AA   | AA   | AA   | AA   | AA   |

**Appendix 1 Multiple sequence alignment of the ParC genes of 14 serotypes of *Ureaplasma* spp.**

(a) Sequence of the *U. parvum* primers/probe; (b) Sequence of the *U. urealyticum* primers/probe.

The nucleotide sequence of 14 serovars of *Ureaplasma* spp. was downloaded from GenBank and aligned using MegaX software. The primers and TaqMan probe were designed by Primer Express 3.0 (Applied Biosystems, Foster City, CA, USA) based on conserved ParC gene regions of *U. parvum* and *U. urealyticum*. The TaqMan probes of target genes were linked to FAM at the 5' terminus.
